# Supplementary material for: Using multi-modal neuroimaging to characterise social brain specialisation in infants
Source: eLife journal article supplement (doi:10.7554/elife.84122), 2023-10-11
Supplement: supp [file elife_poa_e84122_Figure_3_figure_supplement_2.pdf › elife_poa_e84122_Figure_3_figure_supplement_2.pdf]

(c)

SOCIAL vs NON-SOCIAL

(i) THETA BAND

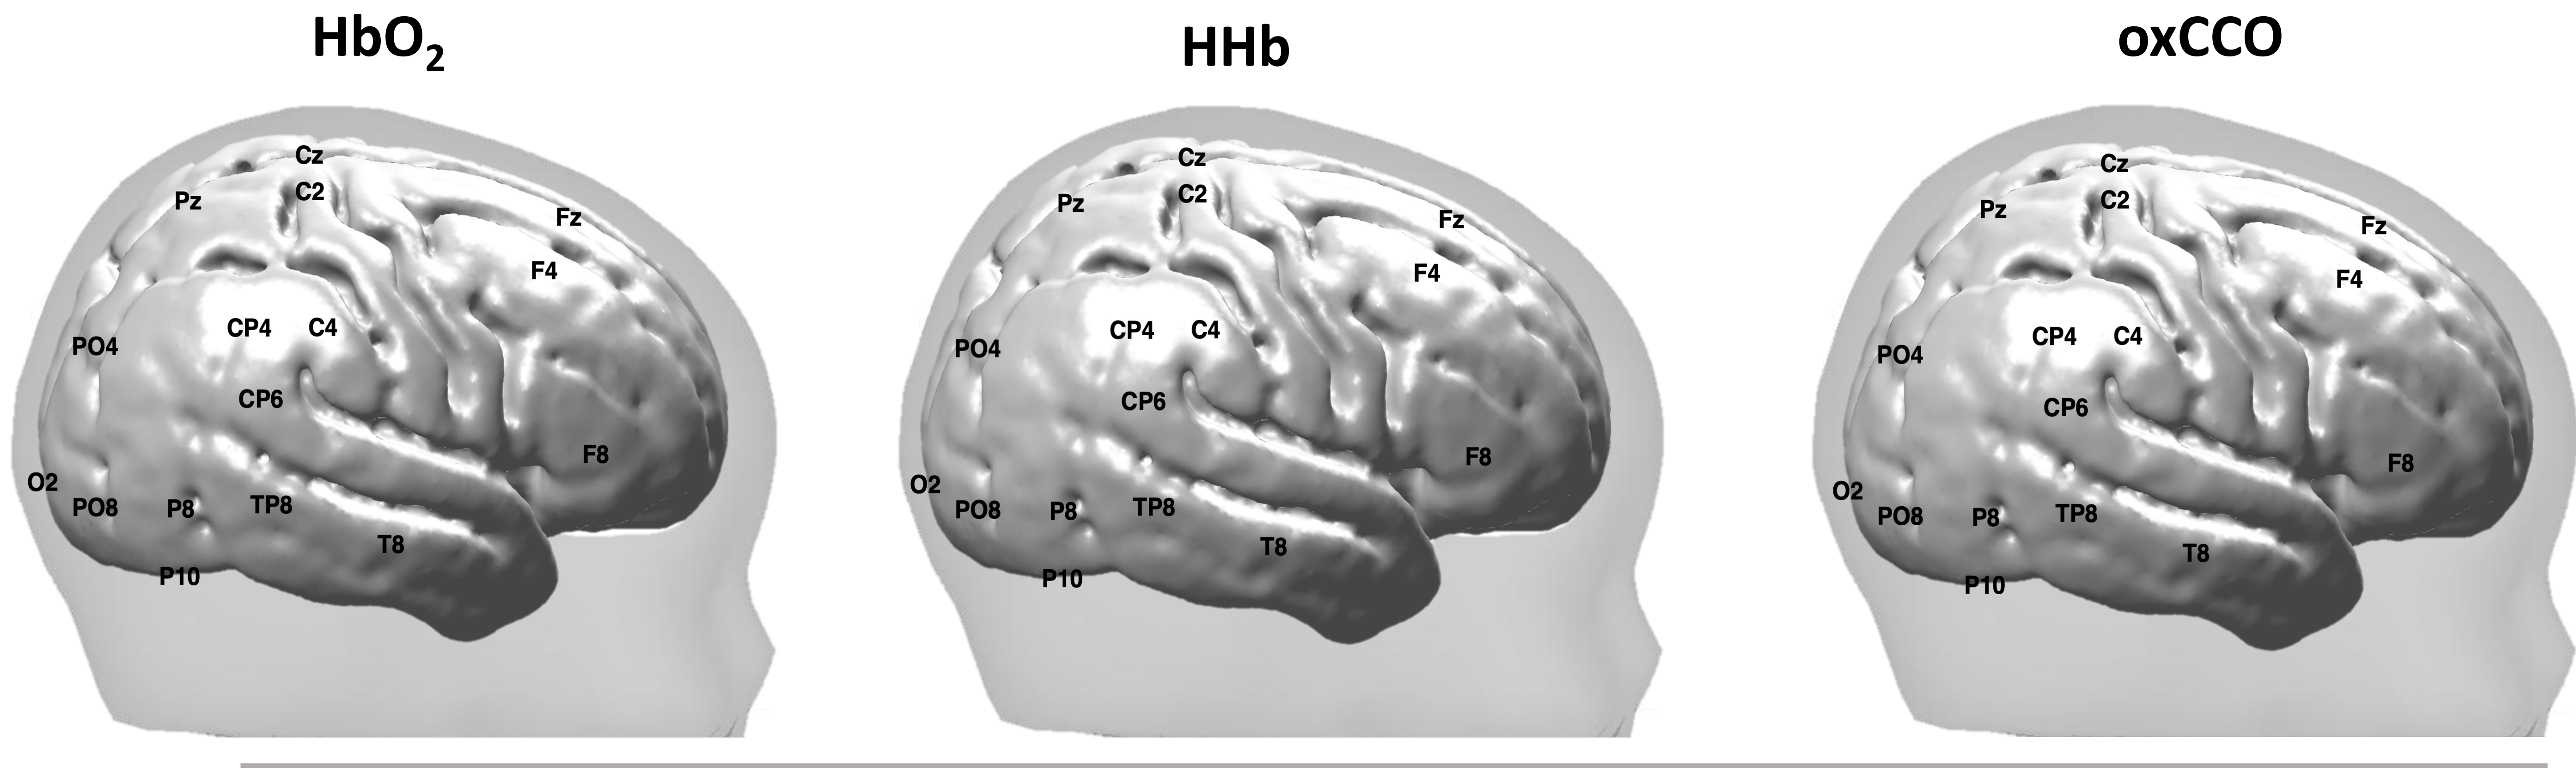

(ii) ALPHA BAND

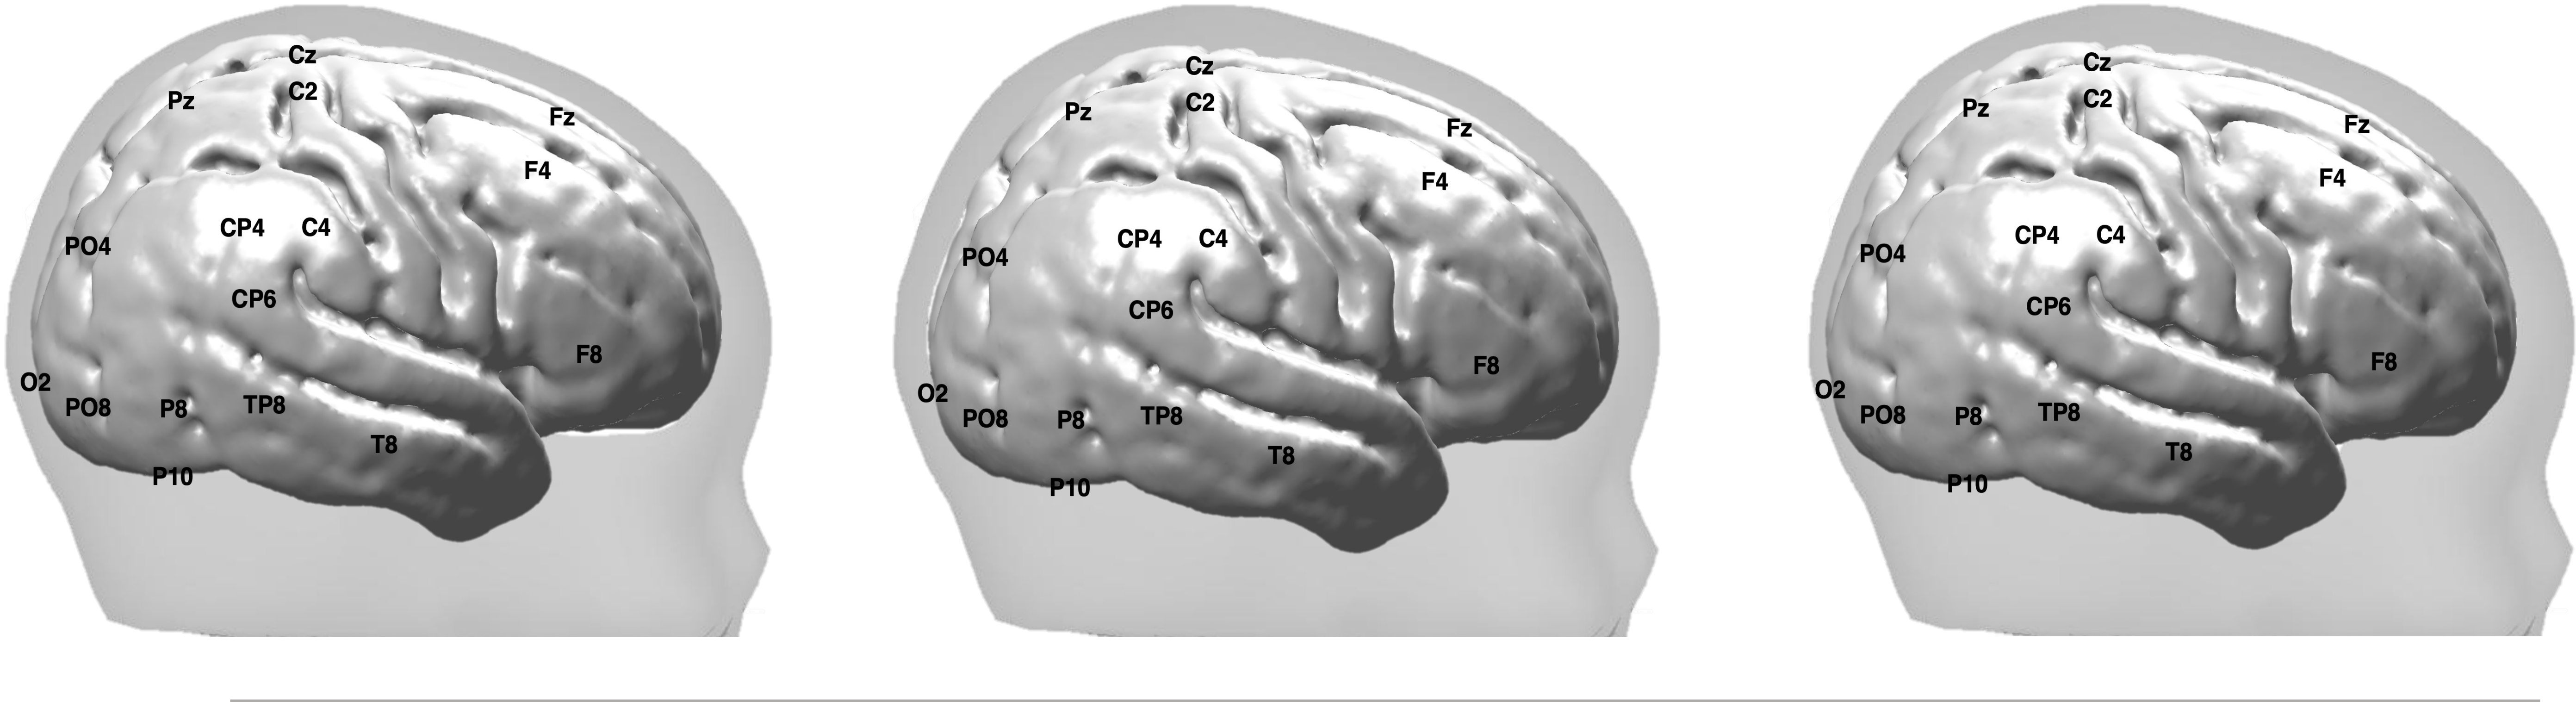

(iii) BETA BAND

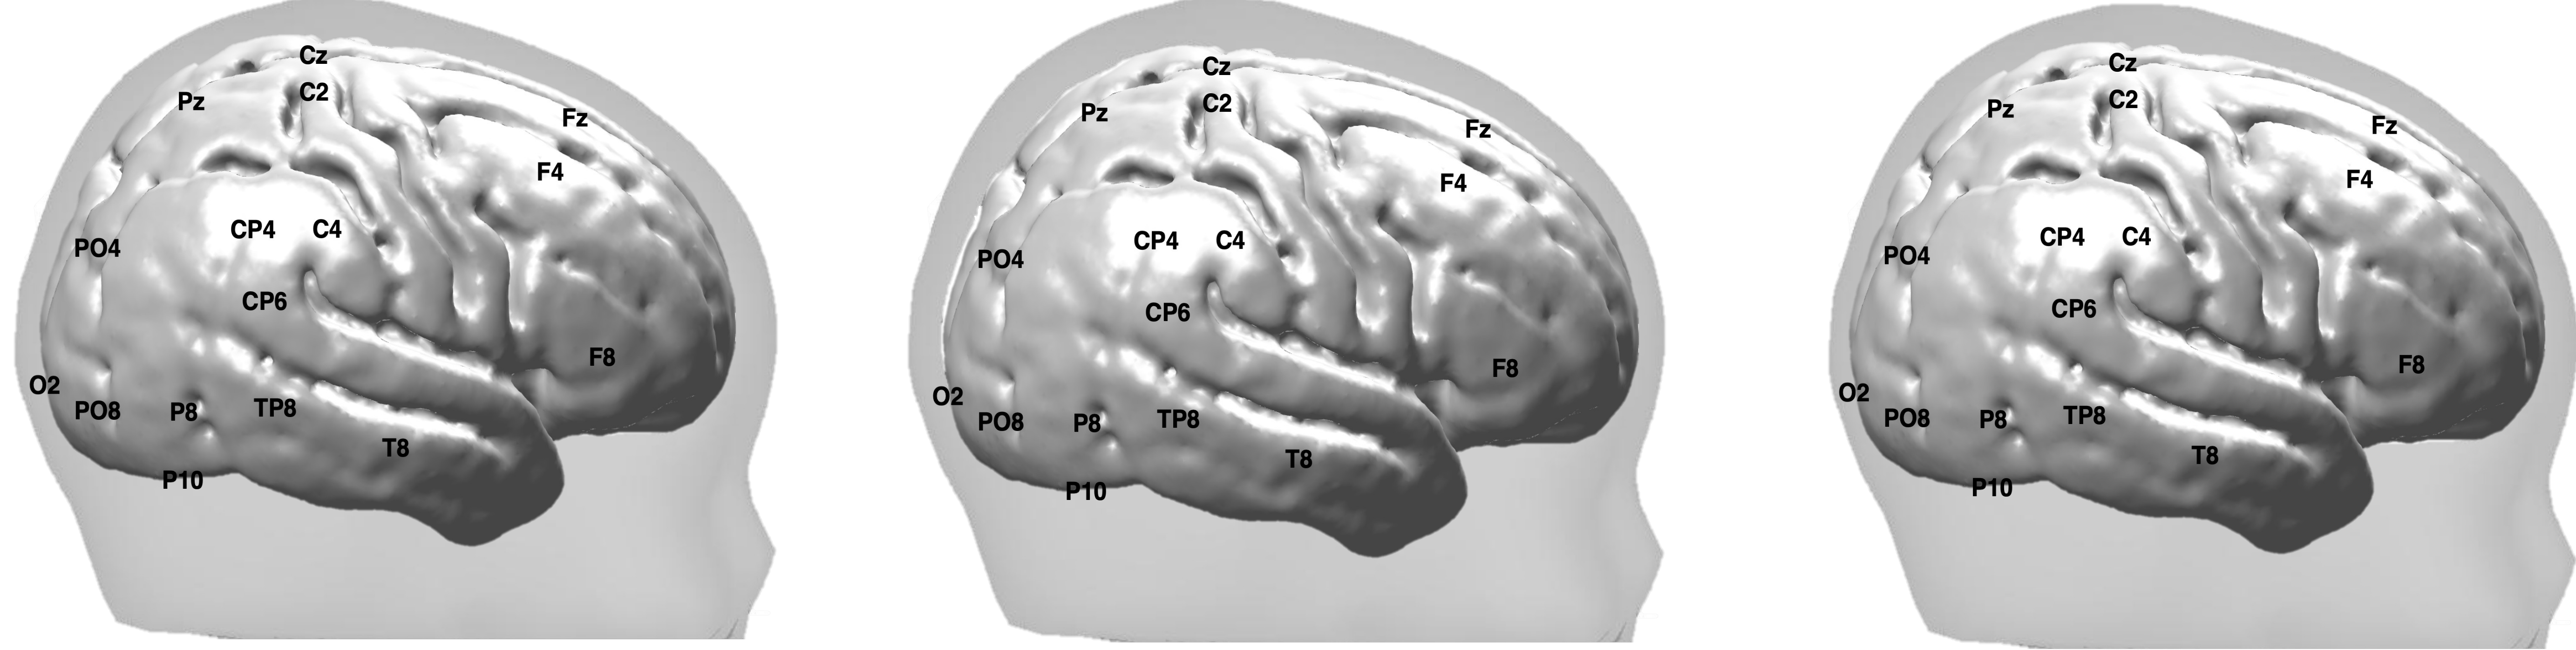

(iv) GAMMA BAND

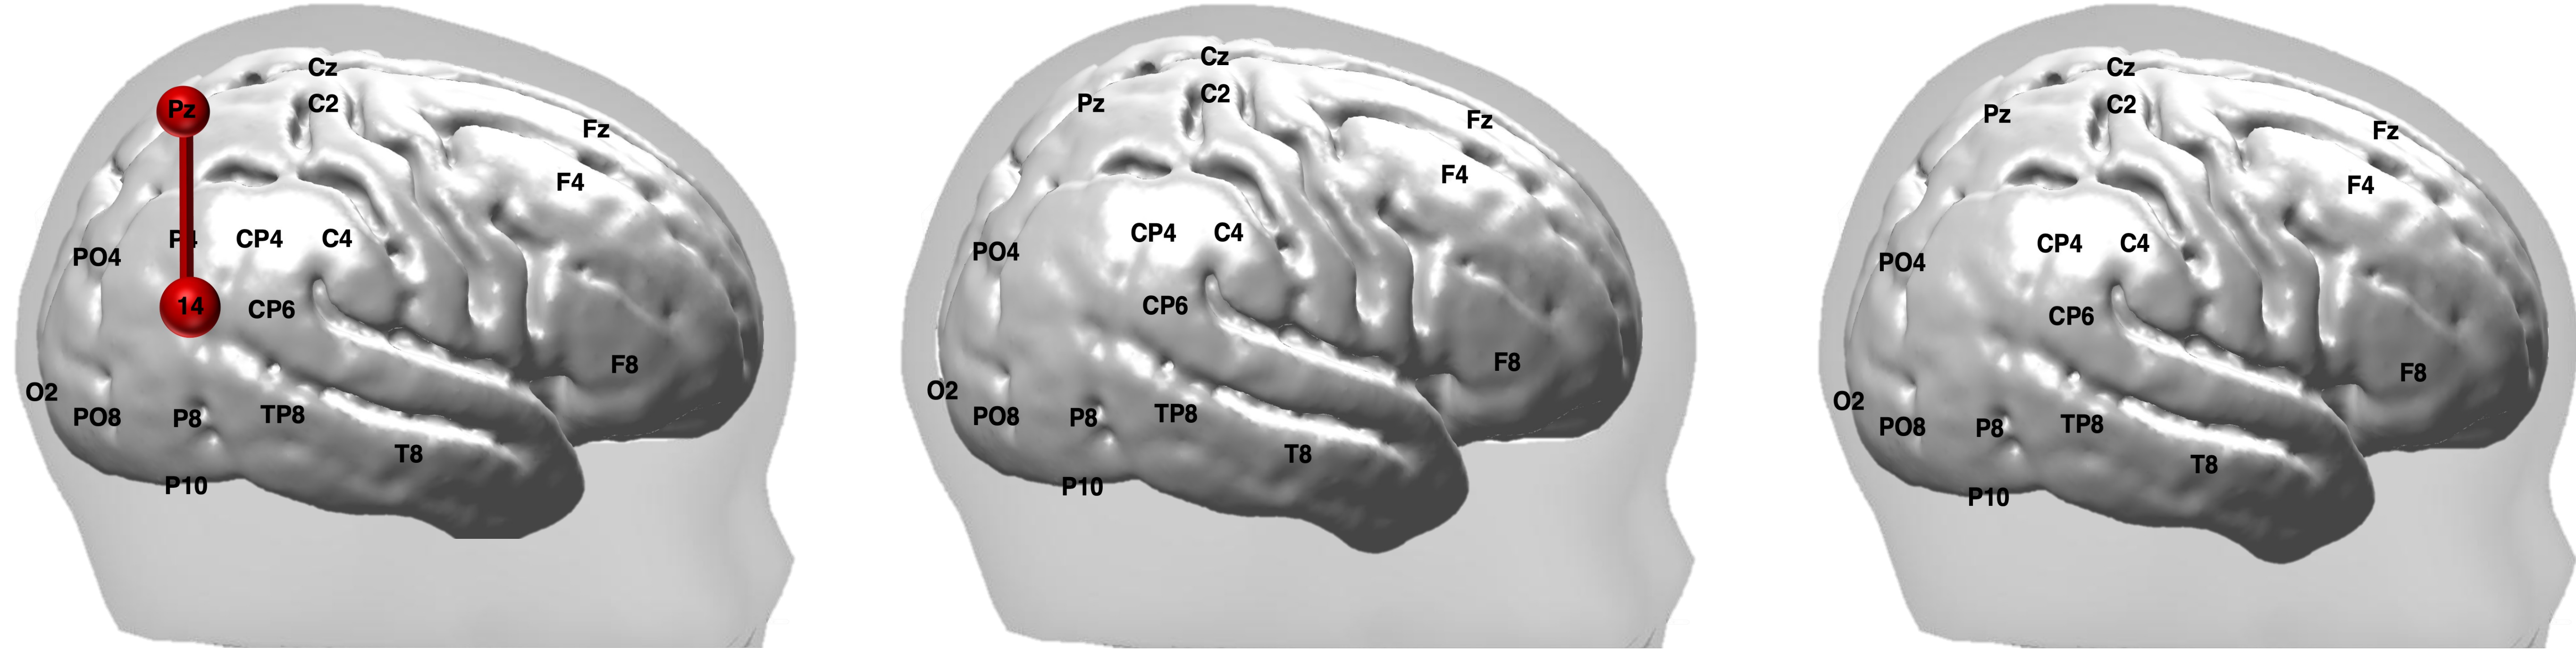

(v) HIGH GAMMA BAND

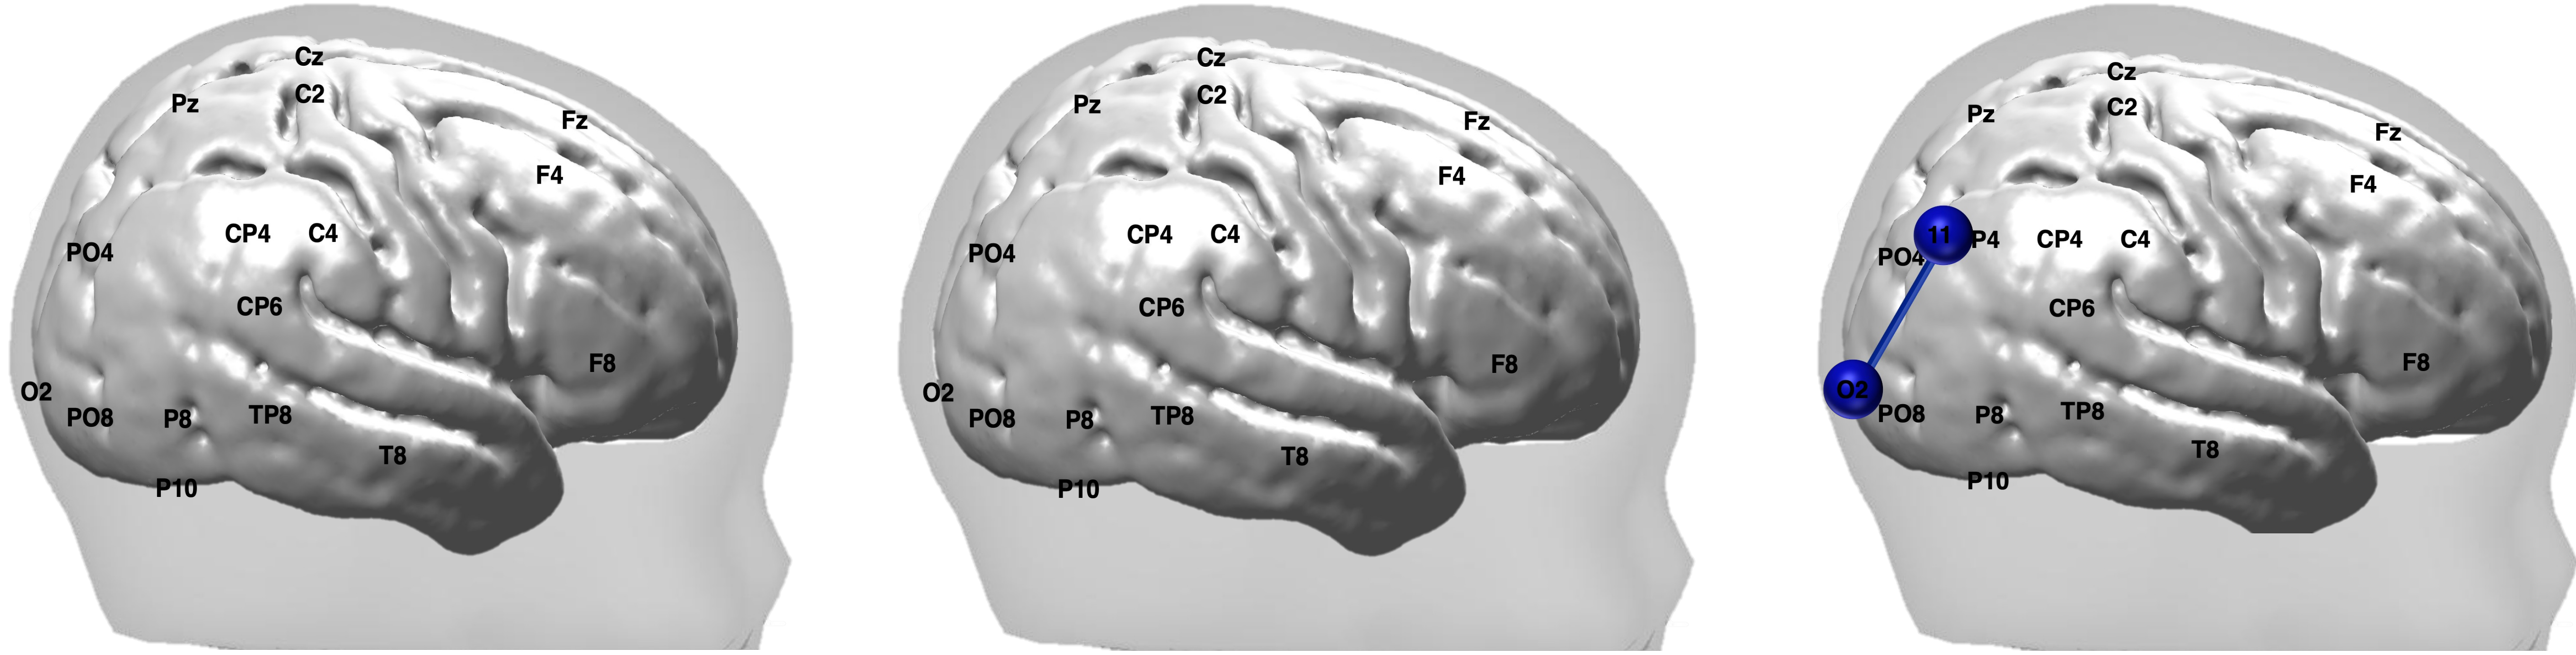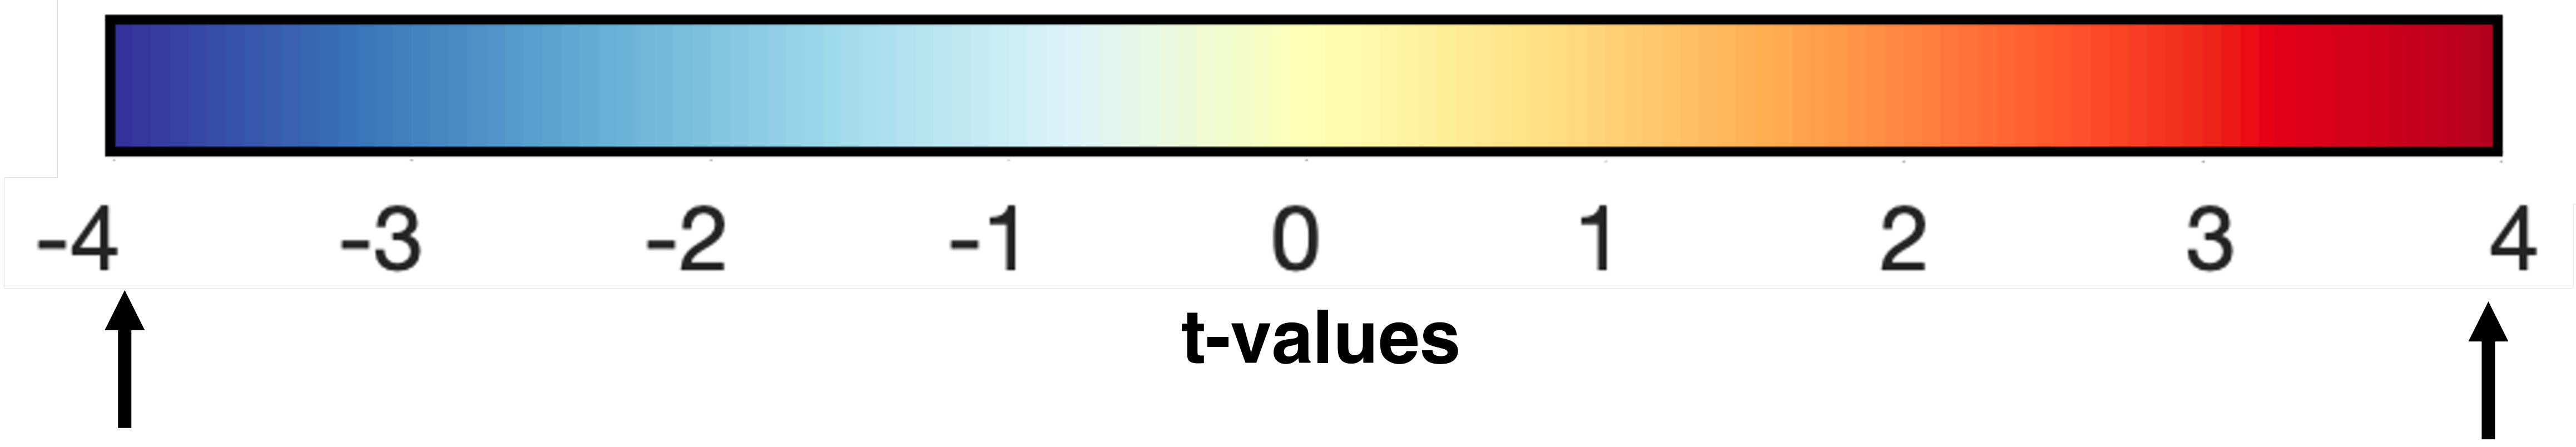

HbO<sub>2</sub> & CCO negative bNIRS – EEG  
(NON-SOCIAL > SOCIAL)

HHb positive bNIRS – EEG  
(SOCIAL > NON-SOCIAL)

HbO<sub>2</sub> & CCO positive bNIRS – EEG  
(SOCIAL > NON-SOCIAL)

HHb negative bNIRS – EEG  
(NON-SOCIAL > SOCIAL)
