# Supplementary figures and images for: Using multi-modal neuroimaging to characterise social brain specialisation in infants
Source: eLife journal article supplement (doi:10.7554/elife.84122), 2023-10-11

(b)

(i) THETA BAND

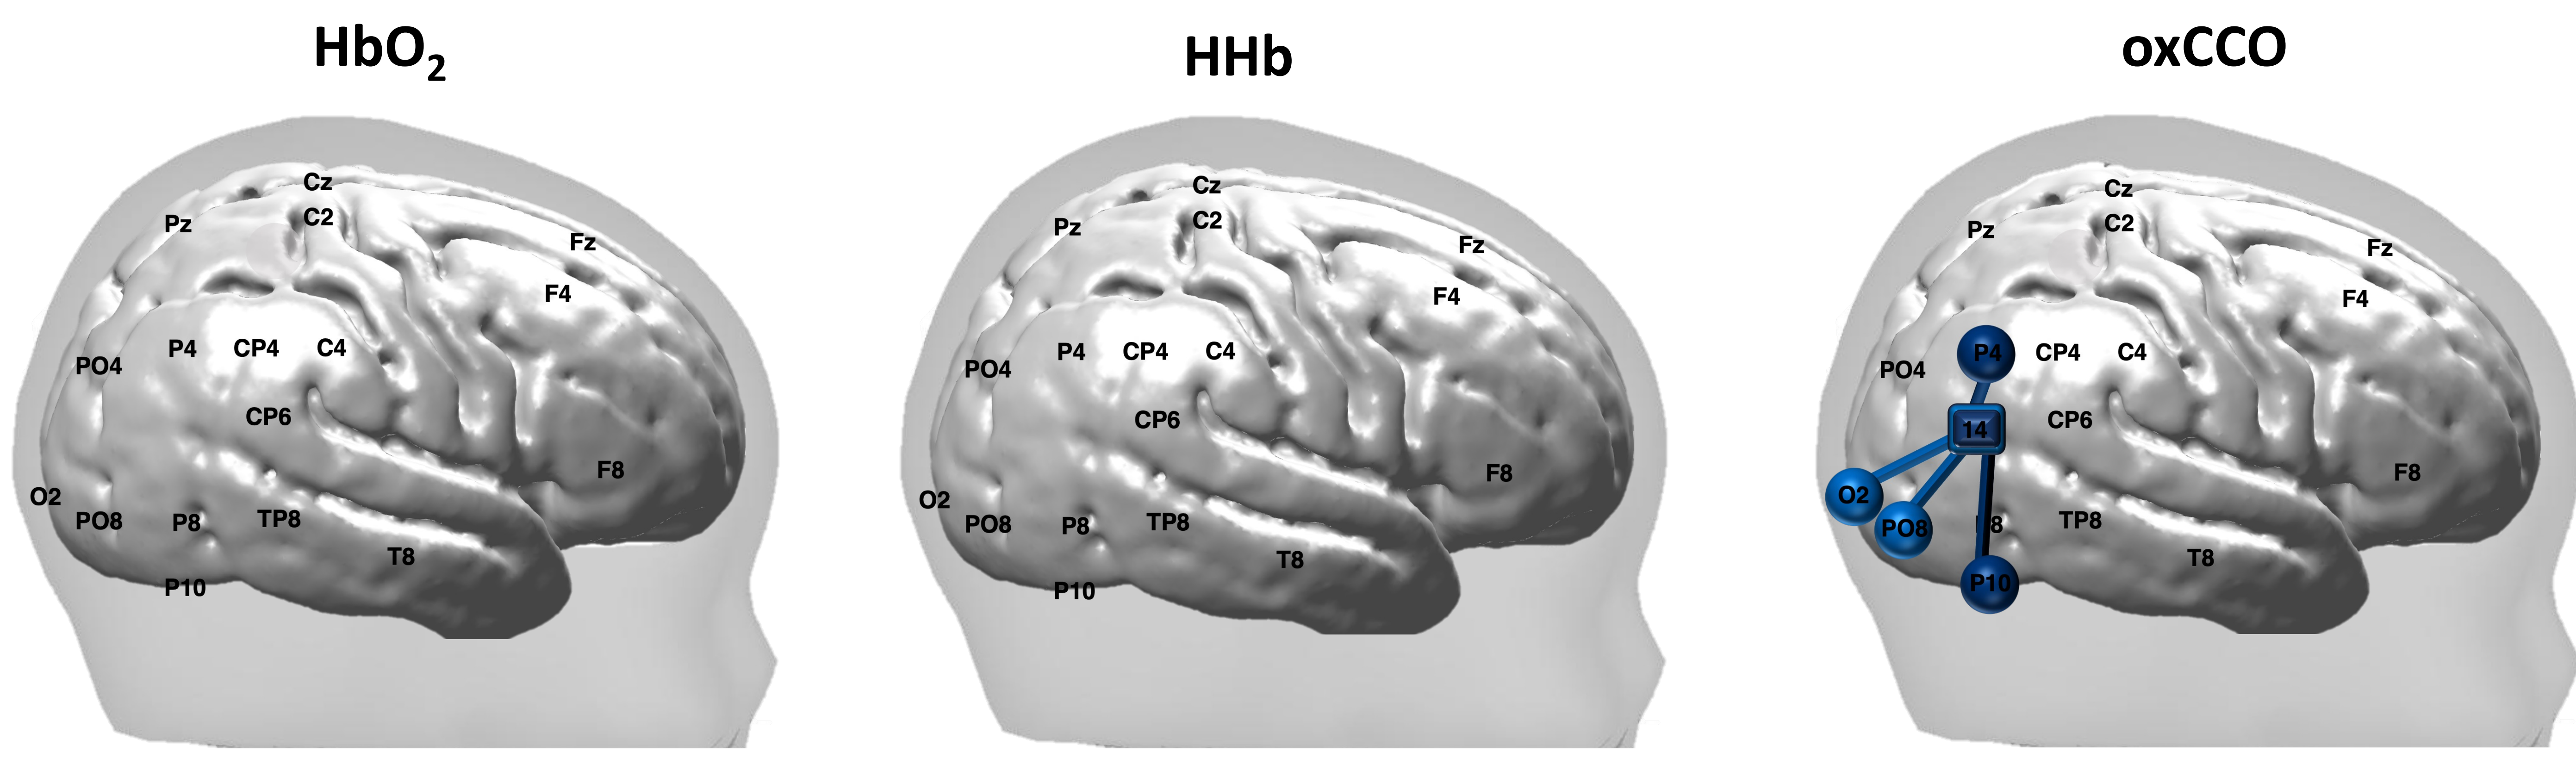

(ii) ALPHA BAND

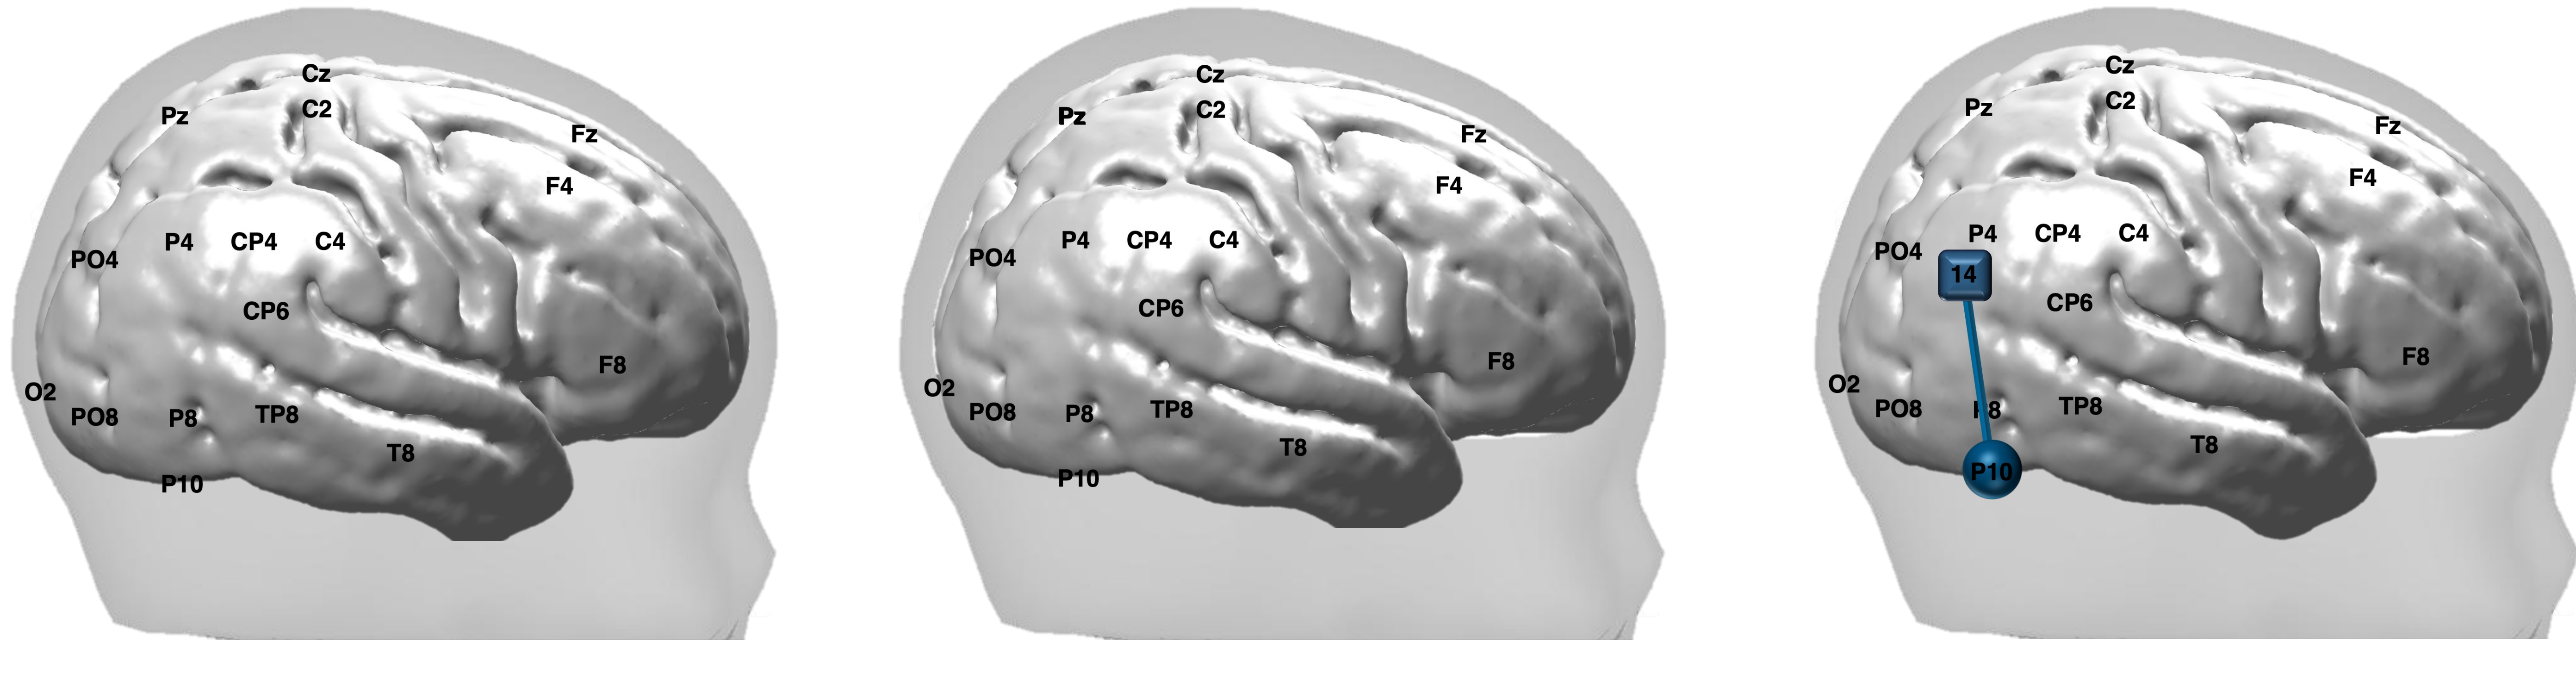

(iii) BETA BAND

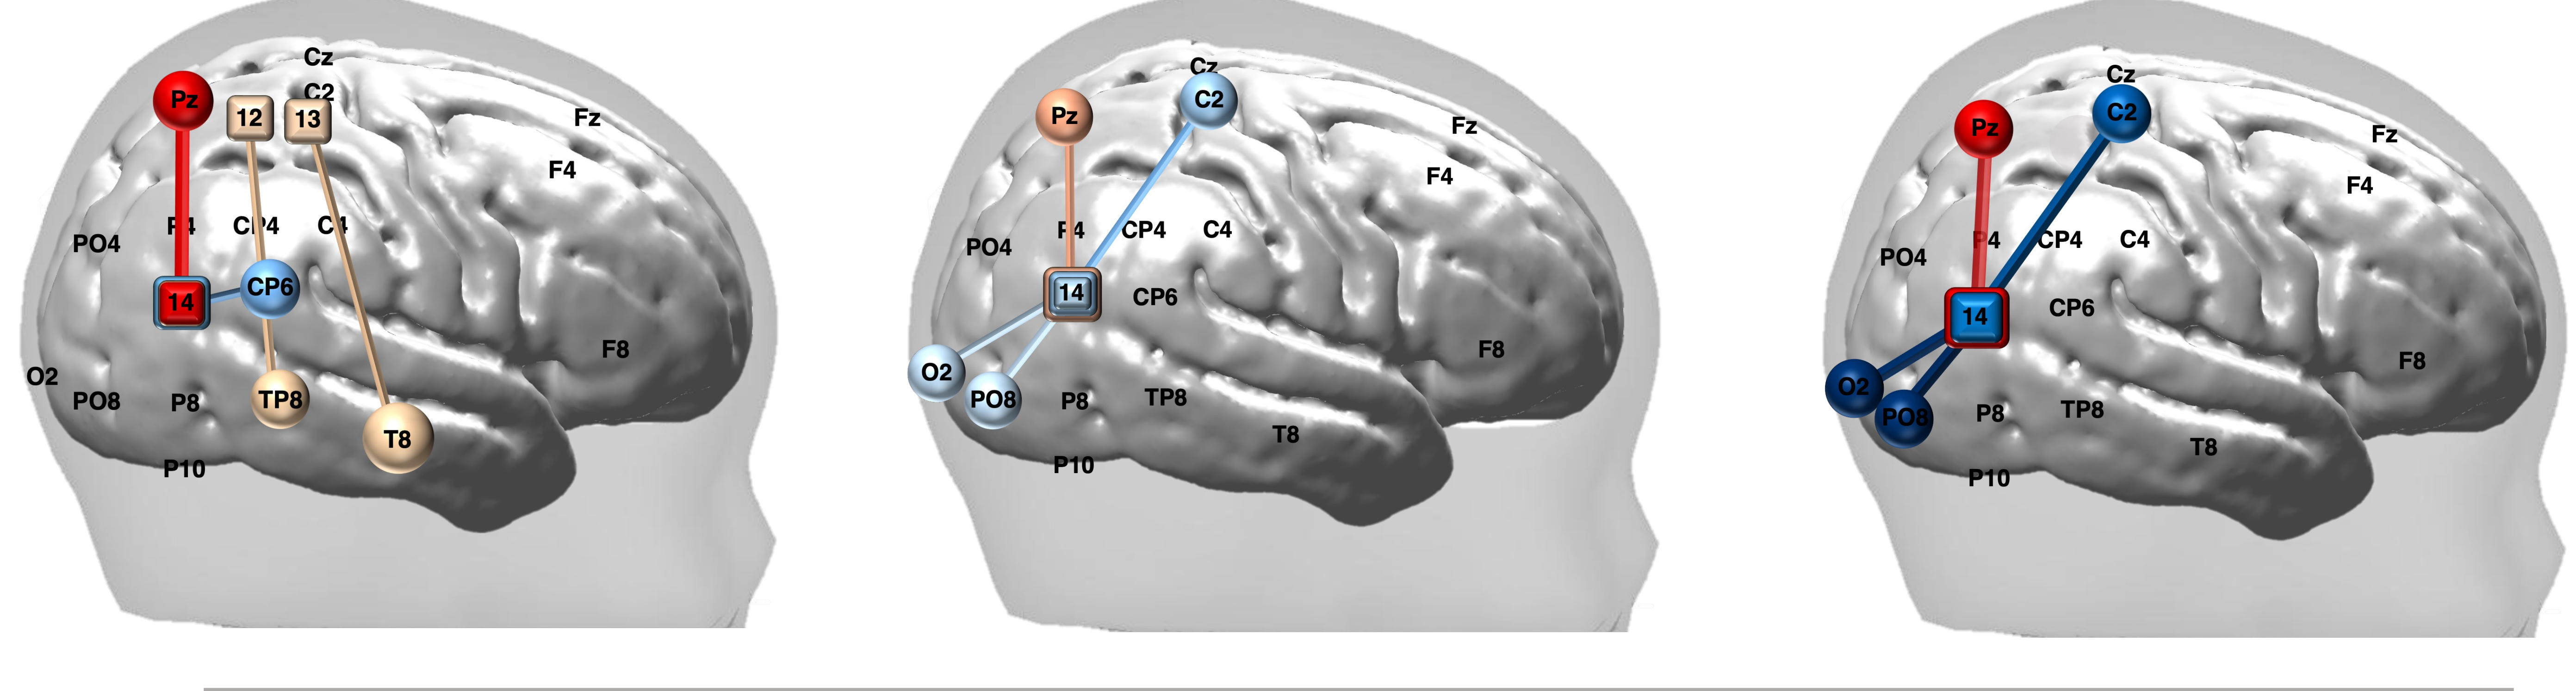

(iv) GAMMA BAND

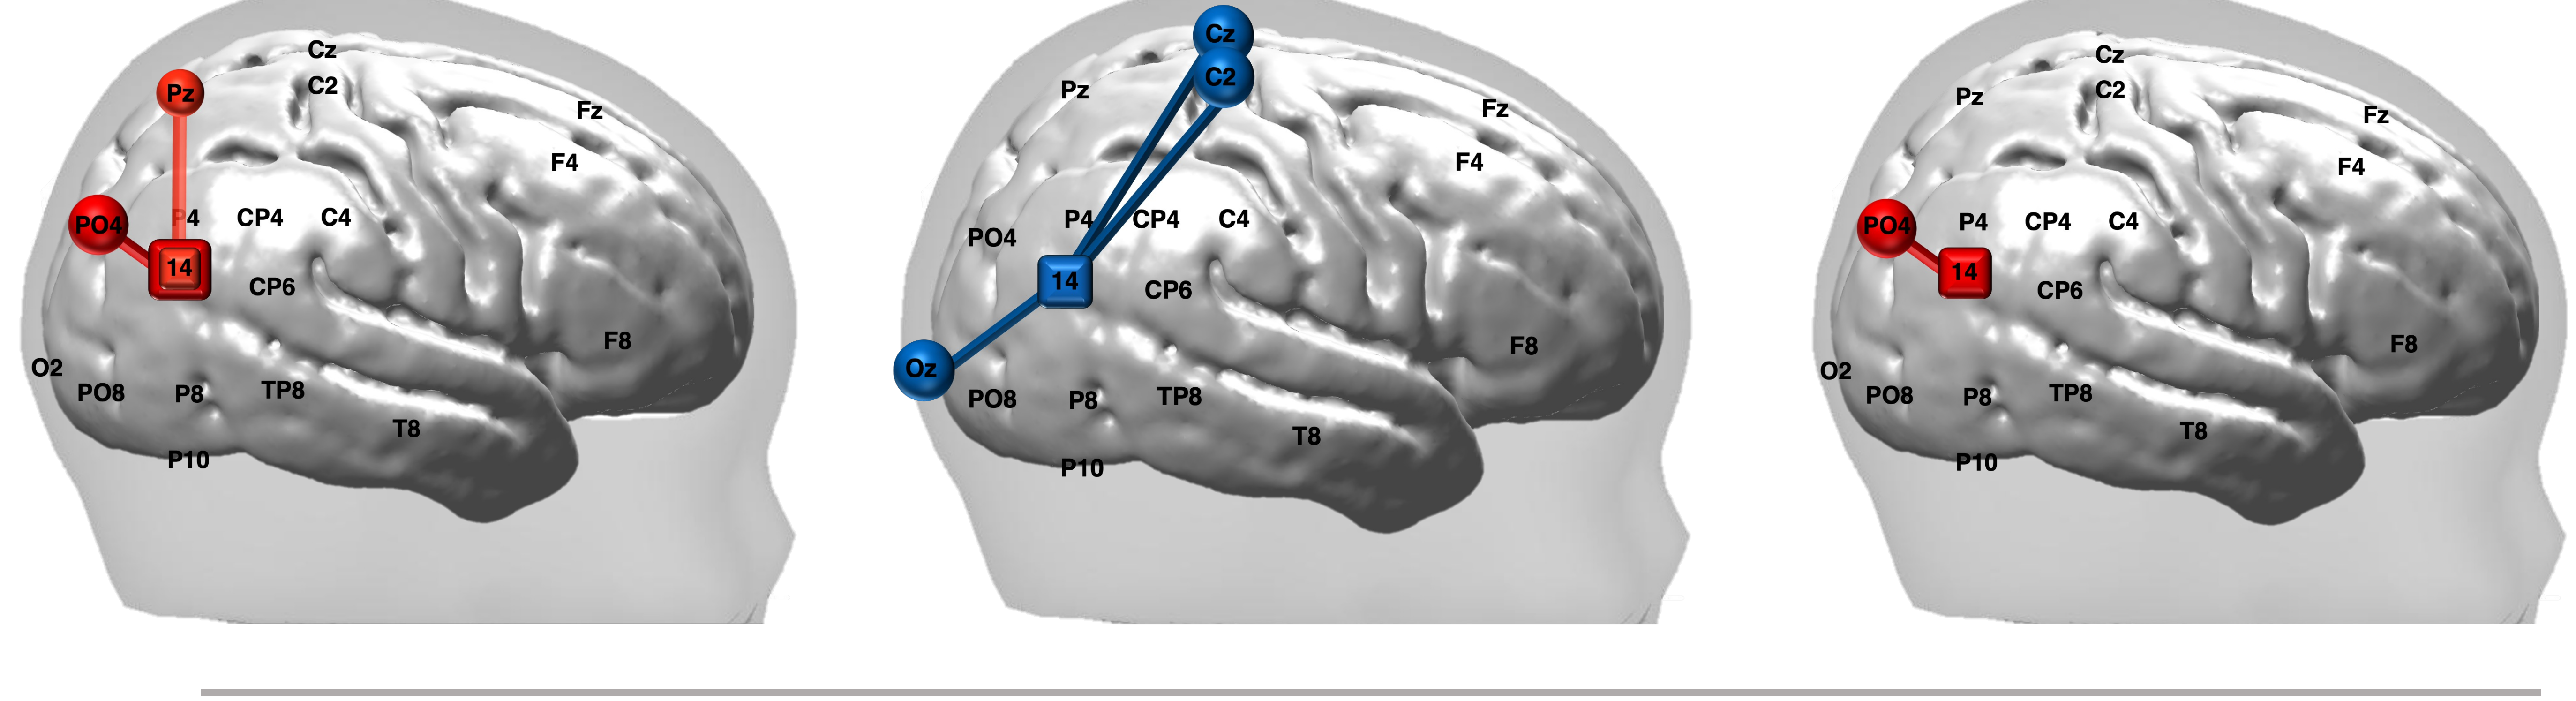

(v) HIGH GAMMA BAND

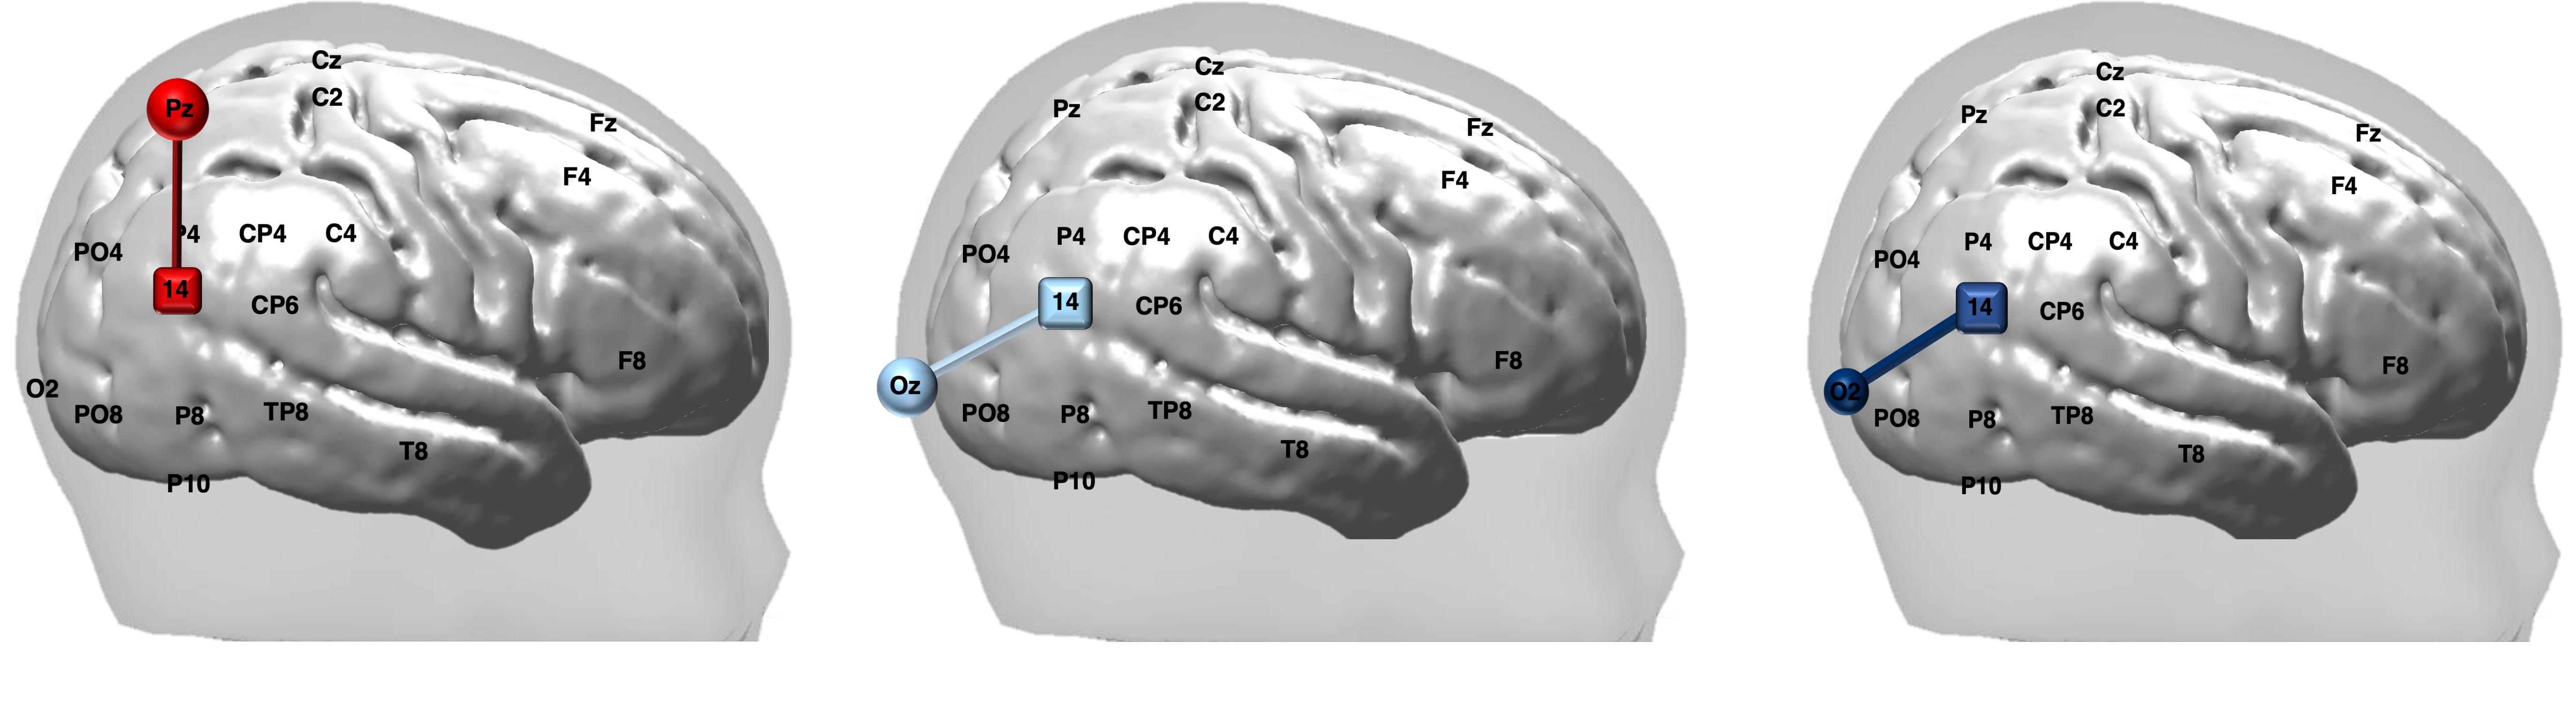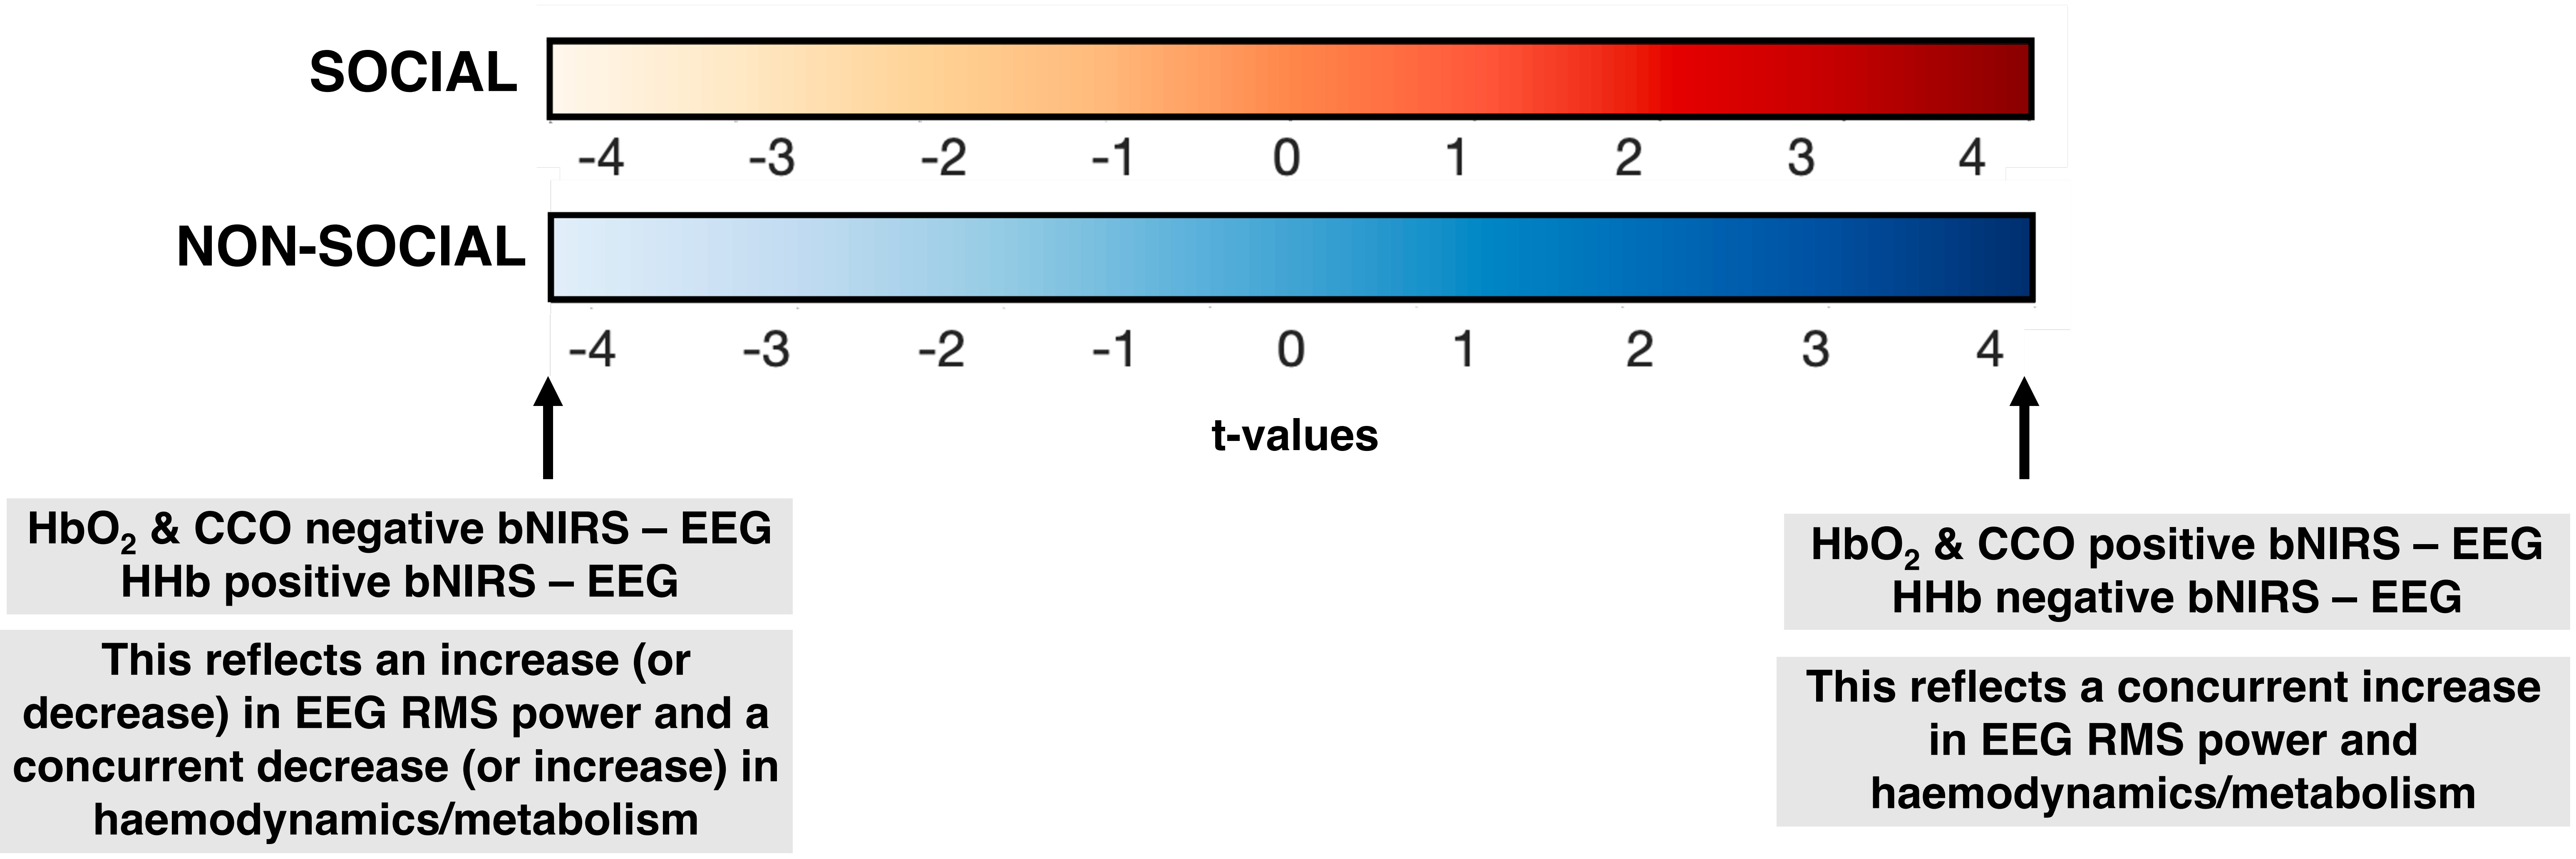

Supplement: supp [file elife_poa_e84122_Figure_3_figure_supplement_1.pdf › elife_poa_e84122_Figure_3_figure_supplement_1.pdf]

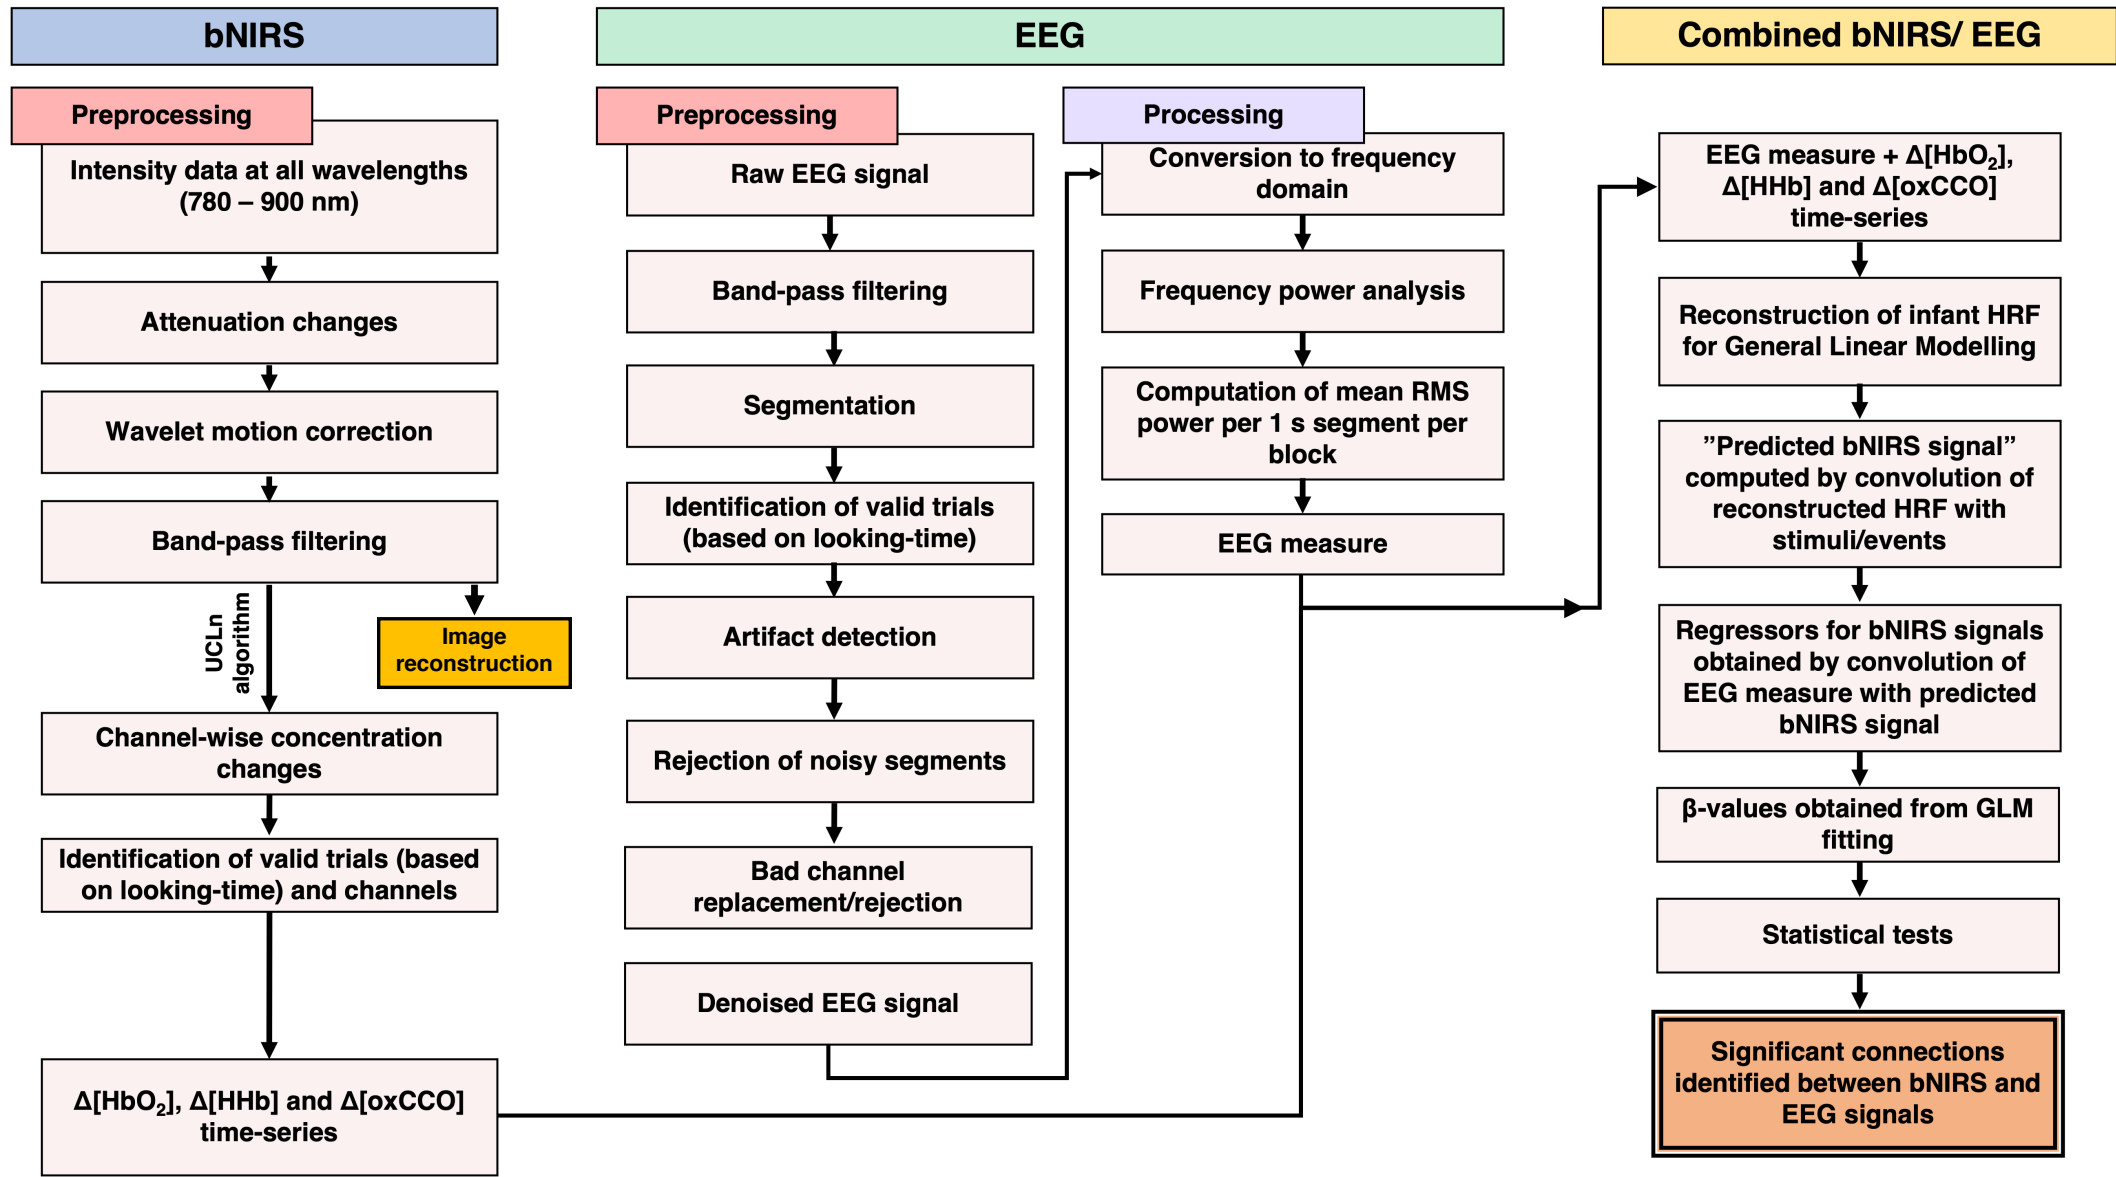

Supplement: supp [file elife_poa_e84122_Figure_6_figure_supplement_2.pdf › elife_poa_e84122_Figure_6_figure_supplement_2.pdf]
